# Supplementary material
Source: publisher figshare collection journal article supplement (https://sage.figshare.com/ndownloader/files/35948995)
Supplement: Supplementary file 1 [file 35948995]

### Legend to Supplemental figure 1.

Workflow for contact tracing.

### Legend to Supplemental Figure 2

Data from the North Denmark Region during the 55-week study period are presented, including A) number of SARS-CoV-2 tests performed in the Region, B) number of confirmed SARS-CoV-2 positives individuals, C) number of hospitalized patients with COVID-19, and D) number for each contact tracing performed at the hospitals in the Region.

**Supplemental table 1.** Data sources are shown in the left column with the corresponding data variables to the right.

| Data source                                                | Data content (variables)                                                                                                                                                                                                                                                                                                                                                                                                                                                                                                                                                                                                                                                                                                                                                                                                                                                                                   |
|------------------------------------------------------------|------------------------------------------------------------------------------------------------------------------------------------------------------------------------------------------------------------------------------------------------------------------------------------------------------------------------------------------------------------------------------------------------------------------------------------------------------------------------------------------------------------------------------------------------------------------------------------------------------------------------------------------------------------------------------------------------------------------------------------------------------------------------------------------------------------------------------------------------------------------------------------------------------------|
| <b>Contact tracing reports</b>                             | Hospital<br>Ward<br>Index case: <ul style="list-style-type: none"><li>- Patient</li><li>- Employee</li></ul> Reason for SARS-CoV-2 testing e.g.: <ul style="list-style-type: none"><li>- Symptoms</li><li>- Screening at admission</li><li>- Systematic screening</li></ul> Geographical location (source of transmission): <ul style="list-style-type: none"><li>- Community acquired</li><li>- Hospital acquired</li><li>- Acquired by work at the hospital</li><li>- Unknown</li></ul> Status at the time of contact tracing: <ul style="list-style-type: none"><li>- Symptomatic index case vs. asymptomatic index case or unknown</li><li>- Number of close contacts</li><li>- Number of close contacts that tested SARS-CoV-2 positive</li><li>- Number of close contacts tested positive at day 0, 4 or 6</li><li>- Number of staff and patients tested positive at testing at day 0 or 7</li></ul> |
| <b>The North Denmark Region Business Intelligence Unit</b> | Number of patients admitted to the each of three hospitals during the project period <ul style="list-style-type: none"><li>- Psychiatry</li><li>- North Denmark Regional Hospital</li></ul>                                                                                                                                                                                                                                                                                                                                                                                                                                                                                                                                                                                                                                                                                                                |

|  |                                        |                                                |                                                                      |                                                                    |                                                                                         |
|--|----------------------------------------|------------------------------------------------|----------------------------------------------------------------------|--------------------------------------------------------------------|-----------------------------------------------------------------------------------------|
|  | Contact tracings with no CC<br>(n=120) | Contact tracings and one or more CC<br>(n=171) | Contact tracings with additional cases (Outbreak) but no CC<br>(n=9) | Contact tracings with additional cases (Outbreak) and CC<br>(n=24) | Contact tracings with additional cases (Outbreak) with SARS-CoV-2 positive CC<br>(n=38) |
|--|----------------------------------------|------------------------------------------------|----------------------------------------------------------------------|--------------------------------------------------------------------|-----------------------------------------------------------------------------------------|

|                                                                   |                                                                                                                                                                                                                                                                                                                                                                                        |
|-------------------------------------------------------------------|----------------------------------------------------------------------------------------------------------------------------------------------------------------------------------------------------------------------------------------------------------------------------------------------------------------------------------------------------------------------------------------|
|                                                                   | - Aalborg University hospital                                                                                                                                                                                                                                                                                                                                                          |
| <b>The North Denmark Region Human resources department</b>        | Number of employees working in the three hospitals, respectively: <ul style="list-style-type: none"> <li>- Psychiatry</li> <li>- North Denmark Regional Hospital</li> <li>- Aalborg University hospital</li> </ul> Including employees paid by the hour                                                                                                                                |
| <b>Statens Serum Institut National COVID-19 Surveillance data</b> | Total number of confirmed cases: <ul style="list-style-type: none"> <li>- Denmark</li> <li>- The North Denmark Region</li> </ul> Total number of SARS-Co-2 tested in: <ul style="list-style-type: none"> <li>- Denmark</li> <li>- The North Denmark Region</li> </ul> Total number of admissions with COVID-19, at the hospitals in The North Denmark Region during the project period |

**Supplemental table 2.** 362 contact tracings divided into 5 groups depending on, number of cases (1 vs.  $\geq 2$  = Outbreak), number of close contacts (CC) (0 vs.  $\geq 1$ ), and if any CC tested positive for SARS-CoV-2.

|                                               |     |     |    |     |     |
|-----------------------------------------------|-----|-----|----|-----|-----|
| <b>Cases</b>                                  |     |     |    |     |     |
| Patients                                      | 24  | 67  | 2  | 22  | 56  |
| Staff members                                 | 96  | 104 | 18 | 79  | 105 |
| Total                                         | 120 | 171 | 20 | 101 | 161 |
| <b>Reasons for testing</b>                    | -   |     |    |     |     |
| Screening at admission                        | 11  | 37  | 0  | 6   | 9   |
| Symptoms at the time of testing               | 38  | 57  | 10 | 37  | 50  |
| Close contact – community                     | 26  | 24  | 0  | 5   | 5   |
| Close contact - work                          | 0   | 1   | 0  | 1   | 1   |
| Outbreak testing                              | 1   | 4   | 3  | 30  | 78  |
| Systematic screening                          | 19  | 25  | 3  | 8   | 3   |
| Screened at return to hospital after leave    | 0   | 0   | 0  | 1   | 1   |
| Tested due to intra/inter-hospital transfer   | 0   | 1   | 0  | 2   | 1   |
| Discharge to nursing home                     | 1   | 5   | 0  | 2   | 4   |
| Random find                                   | 6   | 9   | 2  | 9   | 2   |
| Contact tracing APP                           | 1   | 0   | 0  | 0   | 0   |
| Test at nursing home                          | 2   | 0   | 0  | 0   | 0   |
| Low risk contacts                             | 0   | 0   | 0  | 0   | 5   |
| Unknown                                       | 15  | 8   | 2  | 0   | 2   |
| Total                                         | 120 | 171 | 20 | 101 | 161 |
| <b>Status at the time of contact tracing</b>  |     |     |    |     |     |
| Symptoms                                      | 48  | 77  | 11 | 51  | 72  |
| Asymptomatic                                  | 56  | 62  | 7  | 47  | 84  |
| Unknown                                       | 16  | 32  | 2  | 3   | 5   |
| Total                                         | 120 | 171 | 20 | 101 | 161 |
| <b>Geographical location for transmission</b> |     |     |    |     |     |
| Community                                     | 63  | 86  | 6  | 17  | 13  |
| Hospital                                      | 1   | 1   | 0  | 17  | 26  |
| Work at hospital                              | 3   | 1   | 0  | 9   | 36  |
| Unknown                                       | 53  | 83  | 14 | 58  | 86  |
| Total                                         | 120 | 171 | 20 | 0   | 161 |
| <b>Close contacts</b>                         |     |     |    |     |     |
| Patients                                      | -   | 94  | -  | 11  | 120 |
| Employees                                     | -   | 626 | -  | 123 | 601 |
| Total                                         | -   | 720 | -  | 134 | 721 |
